# Supplementary material for: Anlotinib, Vincristine, and Irinotecan for Advanced Ewing Sarcoma After Failure of Standard Multimodal Therapy: A Two‐Cohort, Phase Ib/II Trial
Source: PubMed Central journal article supplement — Oncologist. 2021 Mar 8;26(7):e1256–62. doi: 10.1002/onco.13726 (PMC8265337; doi:10.1002/onco.13726), 2021-03-08
Supplement: ONCO-26-e1256-s001.pdf [file ONCO-26-e1256-s001.pdf]

Supplemental Figures for:  
Anlotinib, Vincristine and Irinotecan (AVI) for Advanced Ewing Sarcoma after Failure of Standard Multimodal  
Therapy: A Two-cohort, Phase Ib/II Trial  
Wei Guo et al.

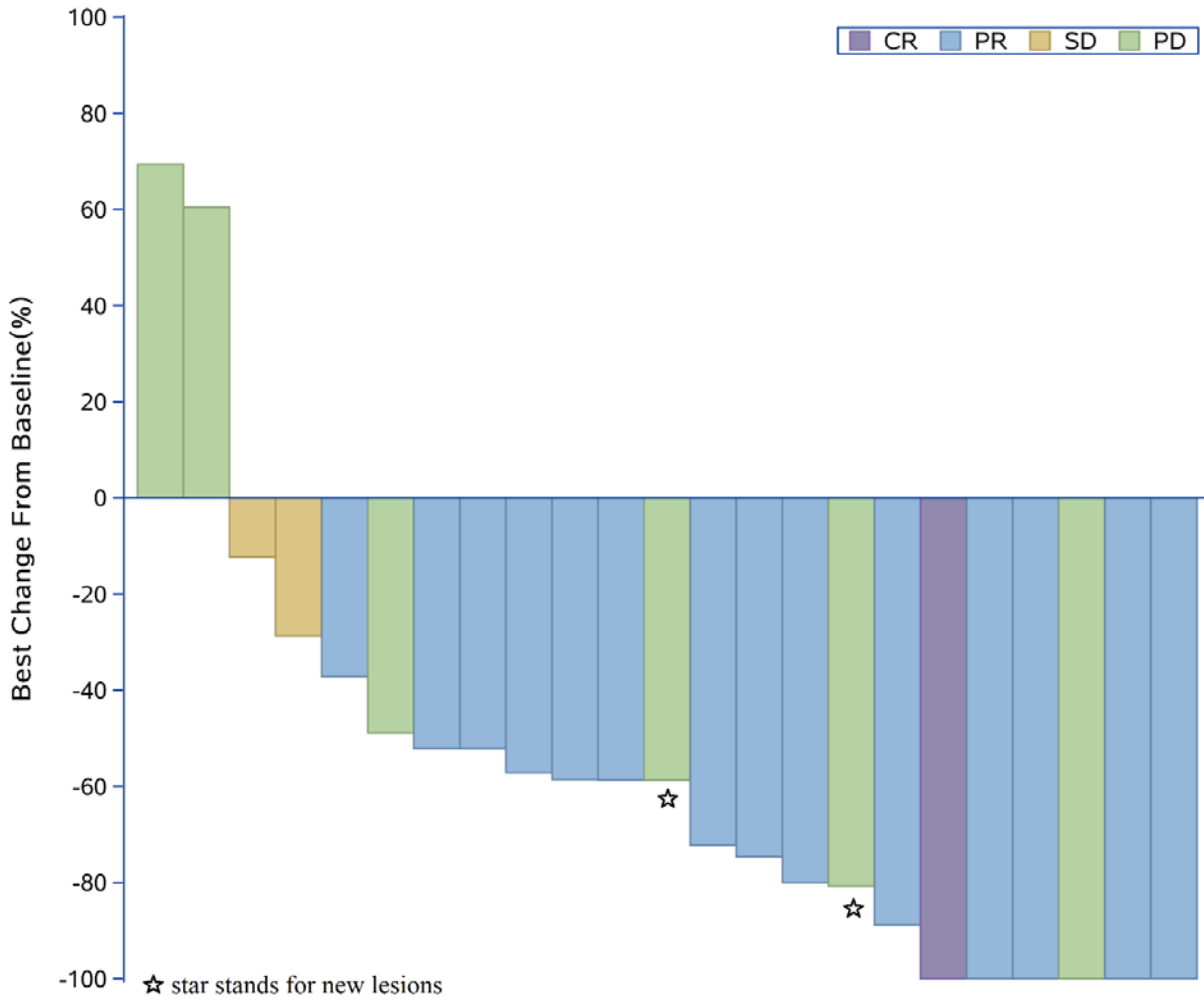

Figure S1a.

Supplemental Figures for:  
Anlotinib, Vincristine and Irinotecan (AVI) for Advanced Ewing Sarcoma after Failure of Standard Multimodal Therapy: A Two-cohort, Phase Ib/II Trial  
Wei Guo et al.

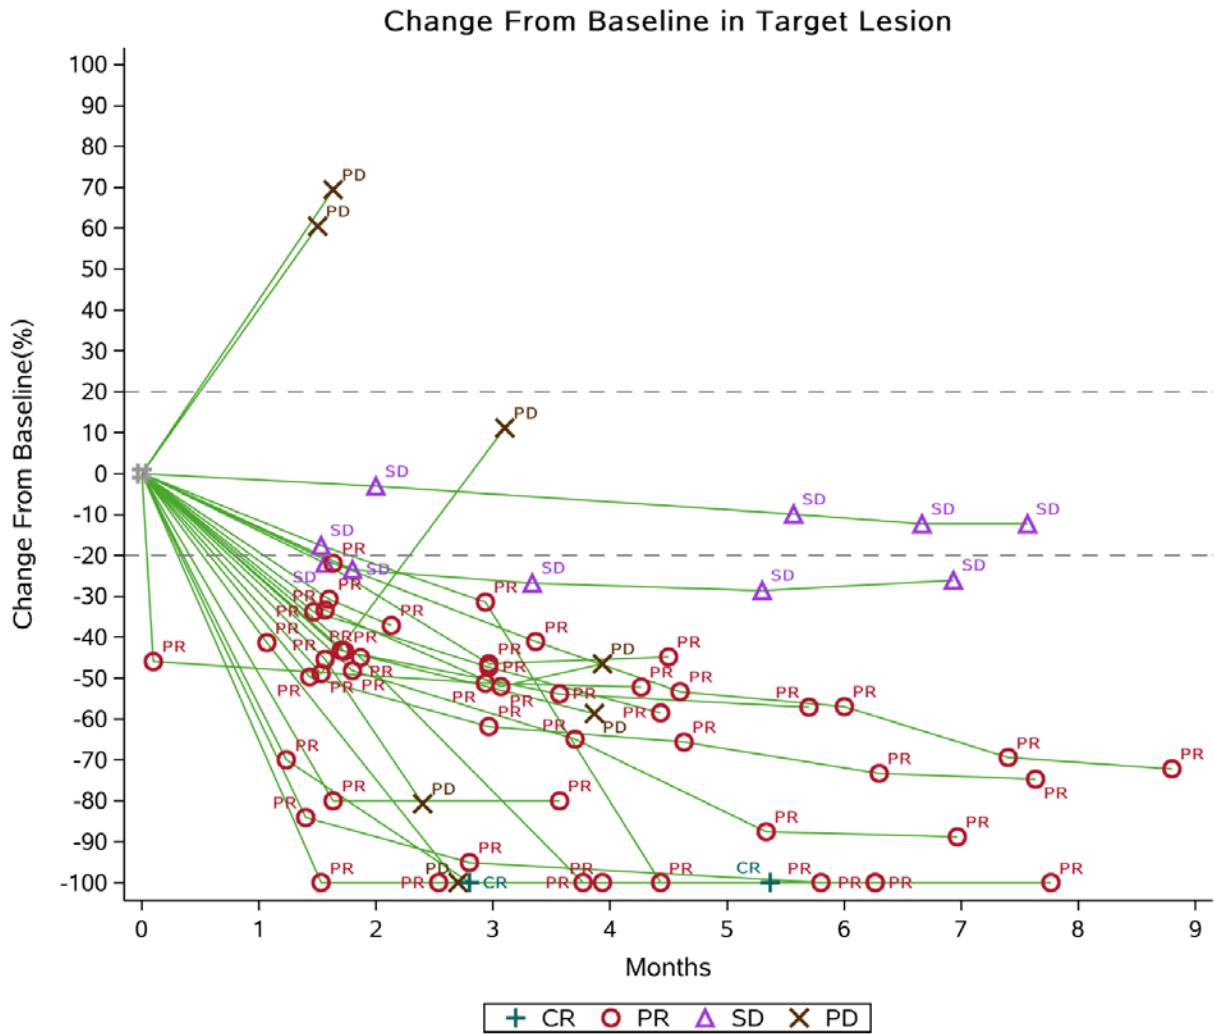

Figure S1B.

Supplemental Figures for:  
Anlotinib, Vincristine and Irinotecan (AVI) for Advanced Ewing Sarcoma after Failure of Standard Multimodal  
Therapy: A Two-cohort, Phase Ib/II Trial  
Wei Guo et al.

Figure

Figure S2a.

Supplemental Figures for:  
Anlotinib, Vincristine and Irinotecan (AVI) for Advanced Ewing Sarcoma after Failure of Standard Multimodal  
Therapy: A Two-cohort, Phase Ib/II Trial  
Wei Guo et al.

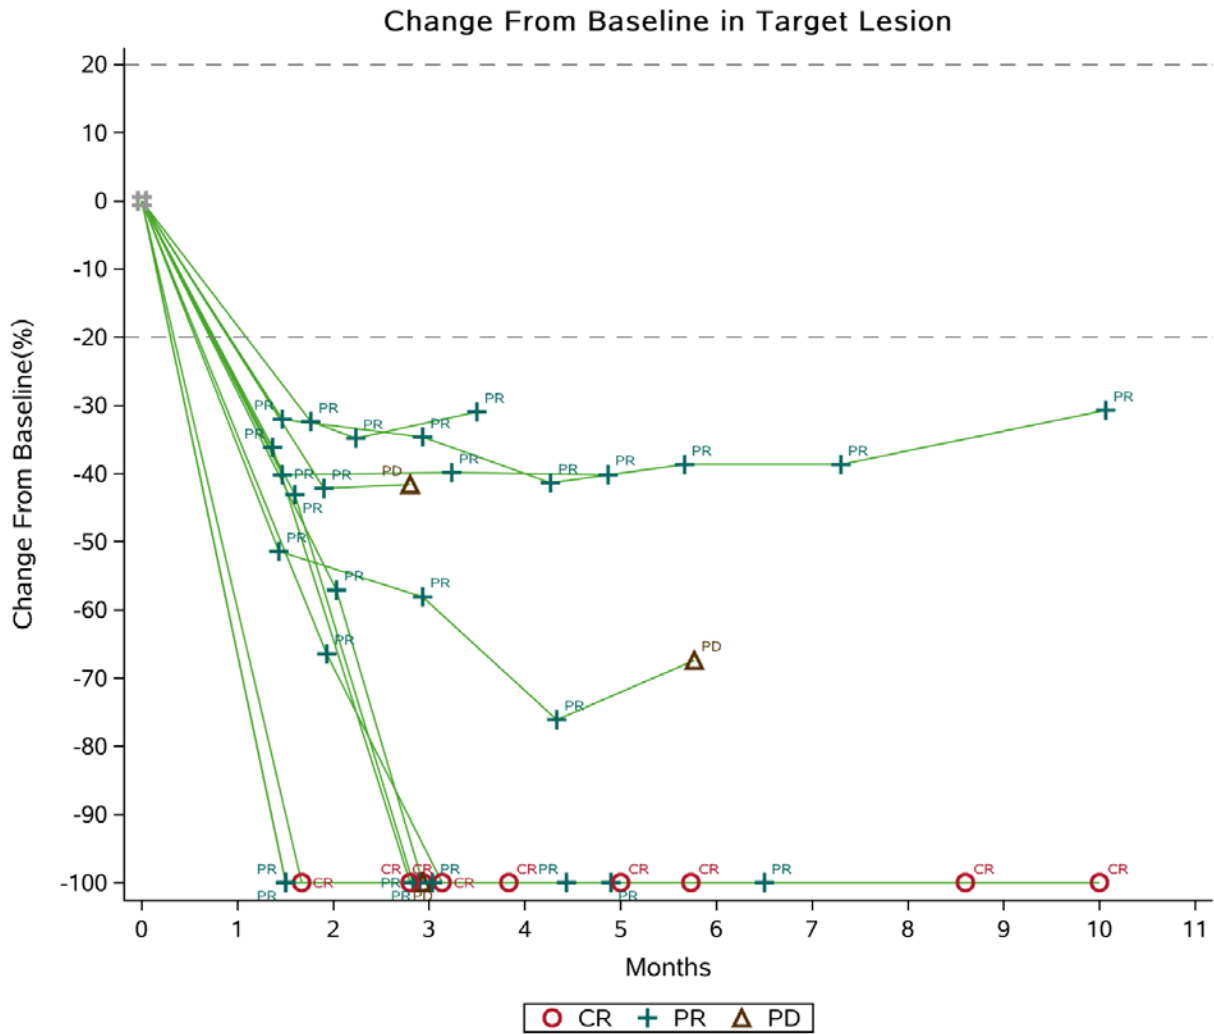

Figure S2b

Supplemental Figures for:  
Anlotinib, Vincristine and Irinotecan (AVI) for Advanced Ewing Sarcoma after Failure of Standard Multimodal Therapy: A Two-cohort, Phase Ib/II Trial  
Wei Guo et al.

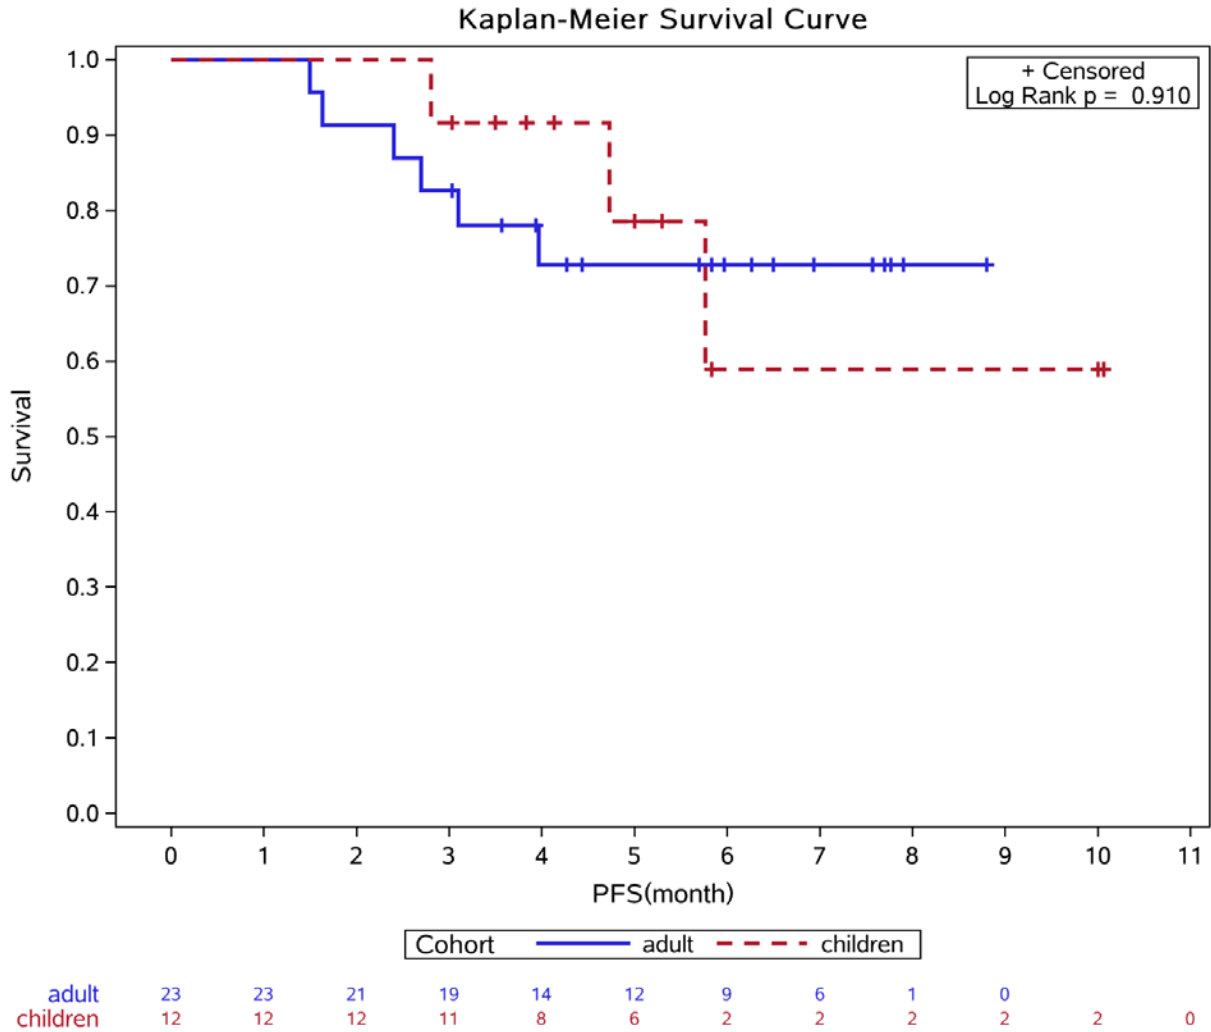

Figure S3.

Supplemental Figures for:  
 Anlotinib, Vincristine and Irinotecan (AVI) for Advanced Ewing Sarcoma after Failure of Standard Multimodal  
 Therapy: A Two-cohort, Phase Ib/II Trial  
 Wei Guo et al.

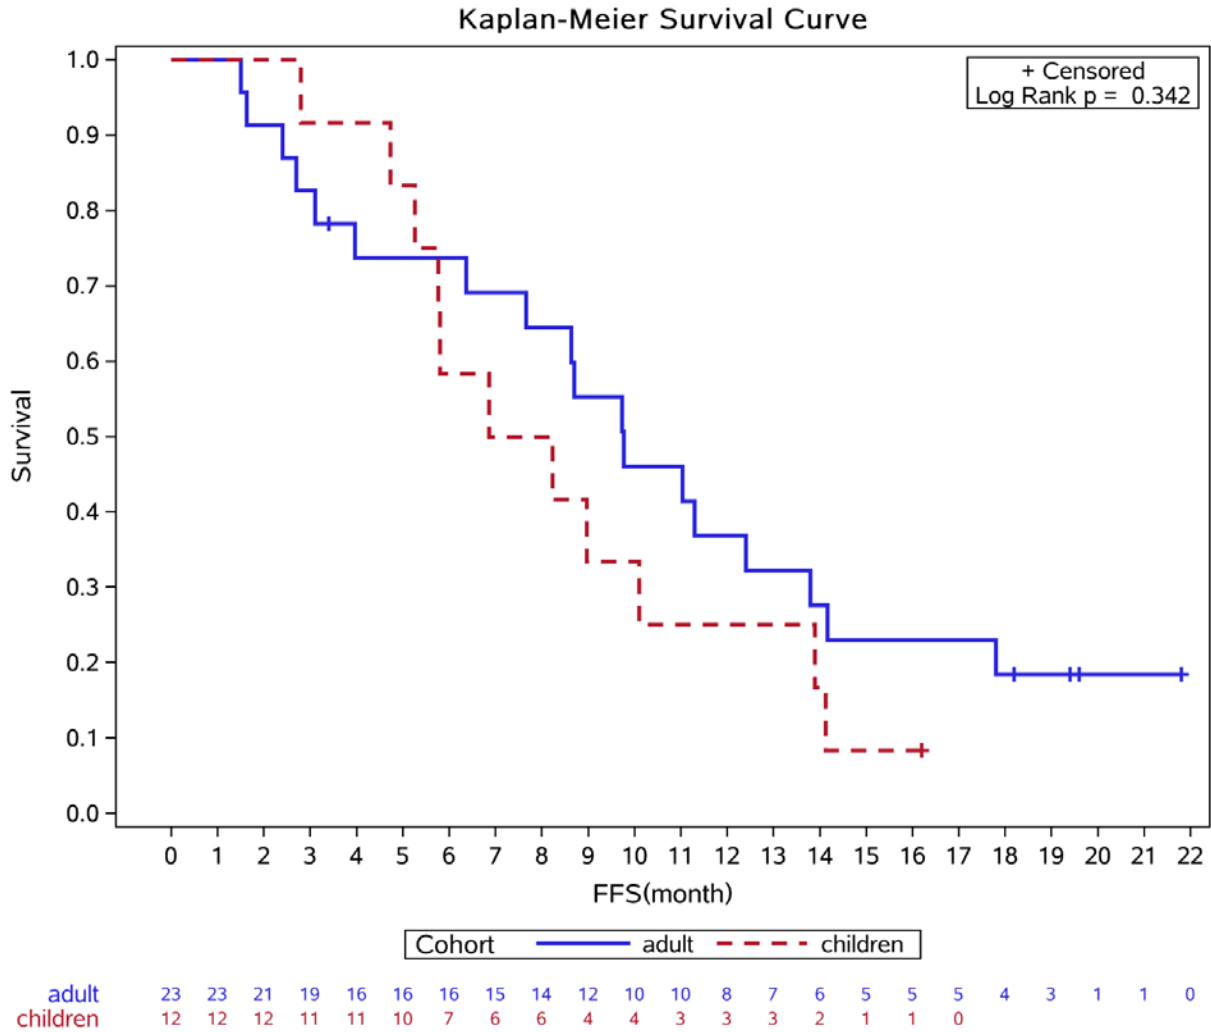

Figure S4.
